# Supplementary material
Source: PubMed Central journal article supplement (PMC2732890)
Supplement: 0902171106_0902171106SI.pdf [file 0902171106_0902171106SI.pdf]

# Supporting Information

Hilge et al. 10.1073/pnas.09021711106

## SI Text

**ITC Data Analysis.** With the exception of constructs binding a single  $\text{Ca}^{2+}$  ion, all data were analyzed with the “sequential binding sites model” implemented in the Origin 7.0 software (Microcal). This model accounts for the nonindependence of the individual  $\text{Ca}^{2+}$ -binding events and suggests the number of binding sites before the fitting. Constructs were measured at least three times to determine the optimal experimental conditions with respect to signal-to-noise ratio and the number of data points. In all cases, experiments were consistent and reproducible. All ITC data, displayed in Fig. 2*A*, *C*, and *D*, Fig. S3, and Fig. S5, are the result of a single ITC experiment under the determined conditions. Protein concentrations were generally 80  $\mu\text{M}$ , except for  $\text{Ca}^{2+}$  titrations of NCX2 CBD2 (Fig. 2*C* and Fig. S3*D*), NCX3 CBD2-B (Fig. 2*C* and Fig. S3*F*), and NCX3 CBD2 E578D/E585K (Fig. S3*H*) where we used 200  $\mu\text{M}$  protein samples to overcome low signal-to-noise ratios as a consequence of small heat pulses. Endothermic heat pulses, absent at lower protein concentrations, were accounted for by the inclusion of an artificial  $\text{Ca}^{2+}$ -binding site that refined to  $K_d$  values of 100  $\mu\text{M}$ –1 mM.

**Particle-Induced X-Ray Emission (PIXE) Analysis.** To determine the exact stoichiometry of the  $\text{Ca}^{2+}$  ions present in the CBD12-AD and CBD12-ACDEF constructs, we used PIXE analysis, where a strong proton beam induces X-ray fluorescence characteristic

for the elements present in the sample. In proteins of known sequence the number of sulfurs can be used as an internal calibration. As a prerequisite, sodium and chloride ions had to be removed from the sample (both give overlapping X-ray emission signals with sulfur) and any other source of sulfur than the protein. Hence, the generally used protein buffer (30 mM NaCl, 130 mM KCl, 2.5 mM  $\beta$ -mercaptoethanol, and 1 mM Hepes, pH 7.0) was exchanged for a 160 mM KBr, 1 mM Bis-Tris propane, pH 7.0, buffer using a 10-kDa amicon ultra filter device (Millipore). The calcium-to-sulfur ratios were then determined with 2.5 MeV proton microbeam PIXE at the Surrey Ion Beam Centre using the method of Garman and Grime (1).

**SAXS Data Analysis.** We initially calculated in a model-independent approach for each construct and condition 20 ab initio reconstructions with the program GASBOR (2). We then compared the reconstructions by superposition. Applying a normalized spatial discrepancy (NSD) selection criterion, at most 1 of 20 structures were rejected. Averaging of the remaining structures with the program DAMAVER (3) resulted in a representative beads model (Fig. 4). Likewise for the rigid-body modeling approach, 20 calculations for each construct and condition were performed with the program SASREF (4). For this purpose, scattering profiles of 20 combinations of individual, lowest-energy CBD1 and CBD2-AD NMR structures were derived with the help of the program CRY SOL (5).

1. Garman EF, Grime GW (2005) Elemental analysis of proteins by microPIXE. *Prog Biophys Mol Biol* 89:173–205.
2. Svergun DI, Petoukhov MV, Koch MH (2001) Determination of domain structure of proteins from X-ray solution scattering. *Biophys J* 80:2946–2953.
3. Volkov VV, Svergun DI (2003) Uniqueness of ab initio shape determination in small-angle scattering. *J Appl Cryst* 36:860–864.
4. Petoukhov MV, Svergun DI (2005) Global rigid body modeling of macromolecular complexes against small-angle scattering data. *Biophys J* 89:1237–1250.
5. Svergun DI, Barberato C, Koch MHJ (1995) CRY SOL - a program to evaluate X-ray solution scattering of biological macromolecules from atomic coordinates. *J Appl Cryst* 28:768–773.
6. Hilge, M, Aelen, J, Vuister, GW (2006)  $\text{Ca}^{2+}$  regulation in the  $\text{Na}^+/\text{Ca}^{2+}$  exchanger involves two markedly different  $\text{Ca}^{2+}$  sensors. *Mol Cell* 22:15–25.



**CBD2** Ca I 6 coordinations + 2 waters  
Ca II 2 coordinations + 5 waters

NCX1 CBD2-AD

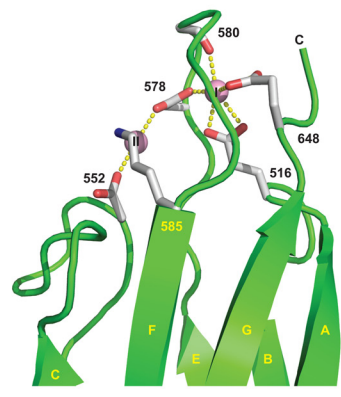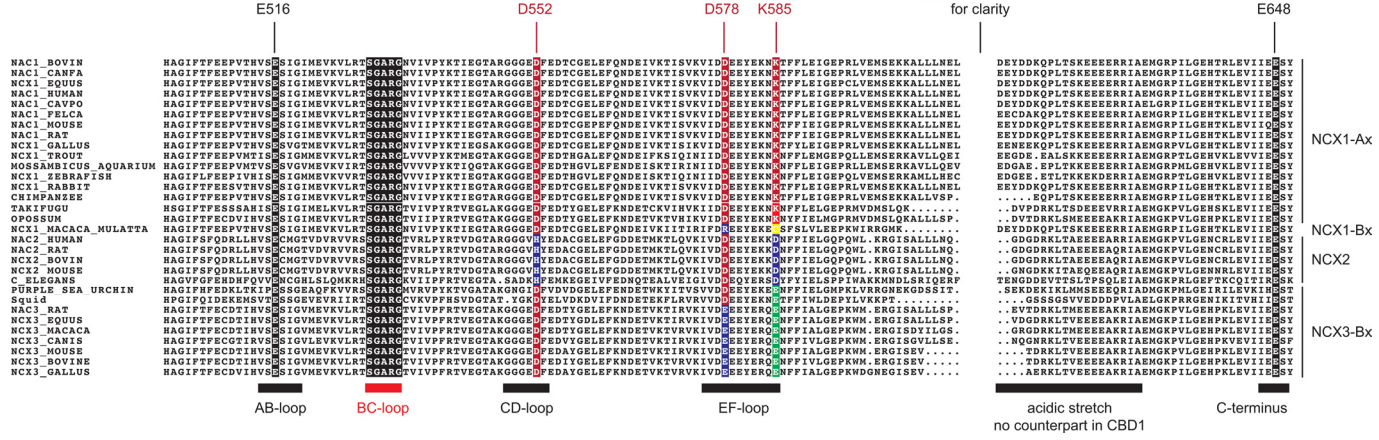

**Fig. S2.** Alignment of all available CBD2 sequences reveals strict conservation of Glu-516 and Glu-648 that contribute four of the six Ca<sup>2+</sup> coordinating atoms in Ca<sup>2+</sup>-binding site I of NCX1 CBD2-AD. In strong contrast, Ca<sup>2+</sup>-binding site II displays isoform- and splice variant-specific variability in key-positions 552, 578, and 585. Rhesus monkey (*Macaca mulatta*) represents an exon B-containing NCX1 splice variant. In NCX2 isoforms and *C. elegans* positions 552 and 585 are occupied by a histidine and an aspartate residue, respectively. NCX3 sequences contain exon B and largely retain the Ca<sup>2+</sup>-coordinating residues of CBD1. Indicated in red is the strictly conserved BC-loop that is located in the hinge between CBD1 and CBD2.



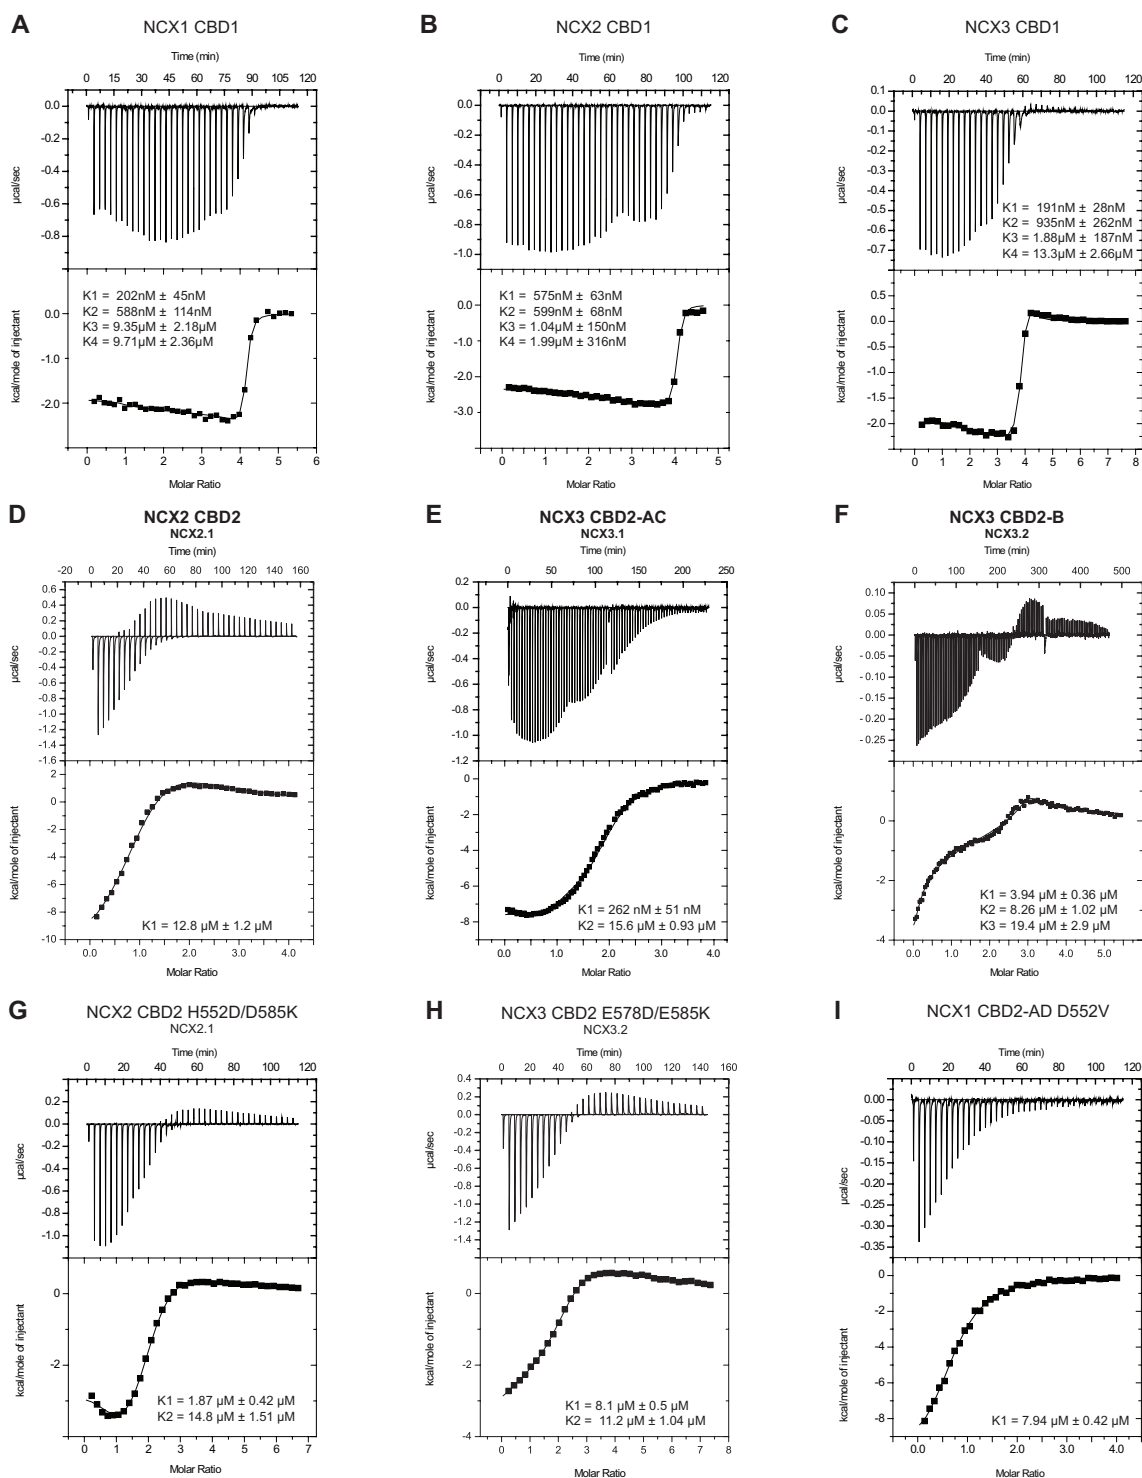

**Fig. S3.** Thermodynamic analyses of CBD1 and CBD2 and ITC control experiments of isoforms NCX2 and NCX3, designed to restore the  $\text{Ca}^{2+}$  coordination scheme of NCX1 CBD2-AD. ITC curves of NCX1 (A), NCX2 (B), and NCX3 (C) CBD1, obtained at pH 7 in 30 mM NaCl and 130 mM KCl, reveal only approximate affinity ranges and are very similar for the three isoforms. In contrast, binding isotherms of NCX2 CBD2 (D), NCX3 CBD2-AC (E), and NCX3 CBD2-B (F) suggest binding of one, two, and three  $\text{Ca}^{2+}$  ions, respectively. The NCX2 CBD2 H552D/D585K (G) and NCX3 E578D/E585K (H) double mutants reveal binding of 2  $\text{Ca}^{2+}$  ions with macroscopic binding constants comparable to NCX1 CBD2-AD (1 and 9  $\mu\text{M}$ ) (6). Similarly to WT NCX2, the NCX1 CBD2-AD D552V mutant (I) shows binding of a single  $\text{Ca}^{2+}$  ion with relatively low affinity. Because of small heat pulses  $\text{Ca}^{2+}$  titrations of NCX2 CBD2 (Fig. S3D) and NCX3 CBD2-B (Fig. S3F) had to be performed at higher protein concentrations (200  $\mu\text{M}$ ). The endothermic heat pulses, absent at lower protein concentrations, were accounted for by including an additional  $\text{Ca}^{2+}$ -binding site that refined to  $K_d$  values of 100  $\mu\text{M}$  or lower.

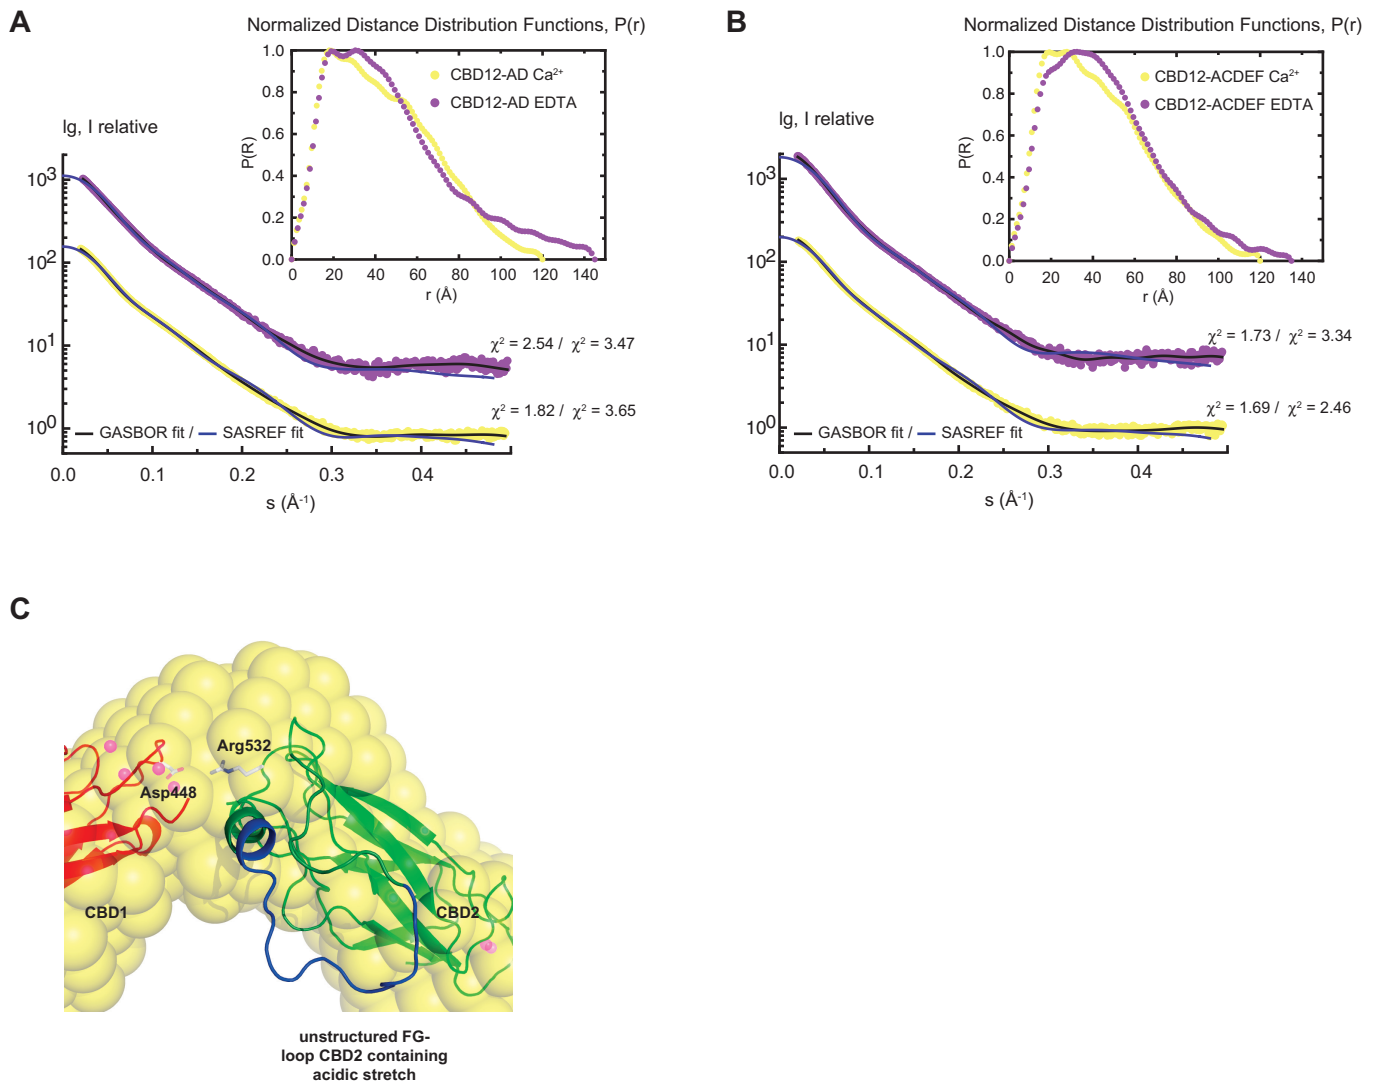

**Fig. S4.** SAXS scattering curves and normalized distance distribution functions  $P(r)$  of brain CBD12-AD (A) and heart CBD12-ACDEF (B) in the presence and absence of  $\text{Ca}^{2+}$ . (C) Hinge region between CBD1 and CBD2, displaying the acidic stretch (blue) in the unstructured FG-loop of CBD2 as well as the mutation-sensitive Asp-448 facing Arg-532 in the strictly conserved BC-loop of CBD2.

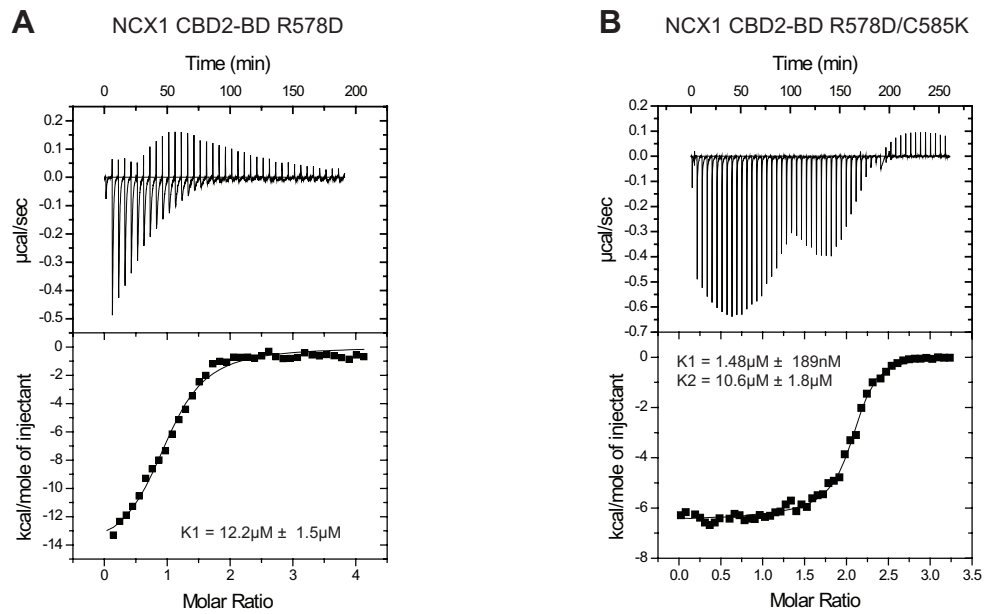

**Fig. S5.**  $\text{Ca}^{2+}$  titrations of the R578D and R578D/C585K CBD2-BD mutants for which functional data display modest and reestablished outward  $\text{Na}^+/\text{Ca}^{2+}$  exchange currents compared with NCX1.3. The ITC analyses of R578D and R578D/C585K reveal binding of one and two  $\text{Ca}^{2+}$  ions, respectively, as well as for the latter very similar  $\text{Ca}^{2+}$ -binding constants to CBD2-AD (6).

Table S1. Experimental NMR data and structural statistics for Ca<sup>2+</sup> free CBD2-AD and CBD2-BD\*

|                                                  | CBD2-AD<br>Ca <sup>2+</sup> free | CBD2-BD                    |
|--------------------------------------------------|----------------------------------|----------------------------|
| NOE upper distance limits                        |                                  |                            |
| Total                                            | 2,623                            | 2,324                      |
| Long-range, spanning five or more residues       | 1,288                            | 1,031                      |
| Distance constraint violations                   |                                  |                            |
| Total number >0.3 Å                              | 0                                | 0                          |
| rmsd                                             | 0.012 ± 0.001                    | 0.012 ± 0.001              |
| TALOS-derived angle constraints                  |                                  |                            |
| rmsd                                             | 145                              | 140                        |
| Violations >3°                                   | 0.24 ± 0.06                      | 0.37 ± 0.07                |
| Violations >3°                                   | 2                                | 3                          |
| PROCHECK <sup>†</sup> Ramachandran plot analysis |                                  |                            |
| Residues in favored regions                      | 91.4% <sup>‡</sup>               | 91.1% <sup>§</sup>         |
| Residues in additionally allowed regions         | 8.5% <sup>‡</sup>                | 8.5% <sup>§</sup>          |
| Residues in generously allowed regions           | 0.1% <sup>‡</sup>                | 0.2% <sup>§</sup>          |
| Residues in disallowed regions                   | 0.1% <sup>‡</sup>                | 0.1% <sup>§</sup>          |
| CING ROG-scores <sup>¶</sup>                     | 20/39/41%                        | 18/37/46%                  |
| rmsd to the averaged coordinates                 |                                  |                            |
| N, C $\alpha$ , C'                               | 0.43 ± 0.06 Å <sup>‡</sup>       | 0.46 ± 0.08 Å <sup>§</sup> |
| All heavy atoms                                  | 0.89 ± 0.08 Å <sup>‡</sup>       | 0.95 ± 0.10 Å <sup>§</sup> |

\*Average over the 20 conformers with the lowest NOE energies.

<sup>†</sup>Laskowski RA, Rullmannn JA, MacArthur MW, Kaptein R, Thornton JM (1996) AQUA and PROCHECK-NMR: programs for checking the quality of protein structures solved by NMR. *J Biomol NMR* 8:477–486.

<sup>‡</sup>Residues 502–577, 583–598, and 633–648.

<sup>§</sup>Residues 503–576, 586–597, 633–644.

<sup>¶</sup><http://proteins.dyndns.org/CING>.
